# Supplementary material for: Reduced graphene oxide anchored magnetic ZnFe2O4 nanoparticles with enhanced visible-light photocatalytic activity
Source: Royal Society of Chemistry journal article supplement (doi:10.1039/c4ra14587a), 2014-12-22
Supplement: c4ra14587a1.pdf [file c4ra14587a1.pdf]

Supplementary Information

**Reduced Graphene Oxide Anchored Magnetic ZnFe<sub>2</sub>O<sub>4</sub> Nanoparticles with  
Enhanced Visible-light Photocatalytic Activity**

Shouliang Wu, Panpan Wang, Yunyu Cai, Dewei Liang, Yixing Ye, Zhenfei Tian, Jun  
Liu and Changhao Liang\*

Key Laboratory of Materials Physics, Institute of Solid State Physics, Hefei  
Institutes of Physical Science, Chinese Academy of Sciences, Hefei, 230031, PR  
China.

\* Corresponding author. Tel: 86-551-65591129; Fax: 86-551-65591434.

E-mail address: chliang@issp.ac.cn (C. H. Liang)

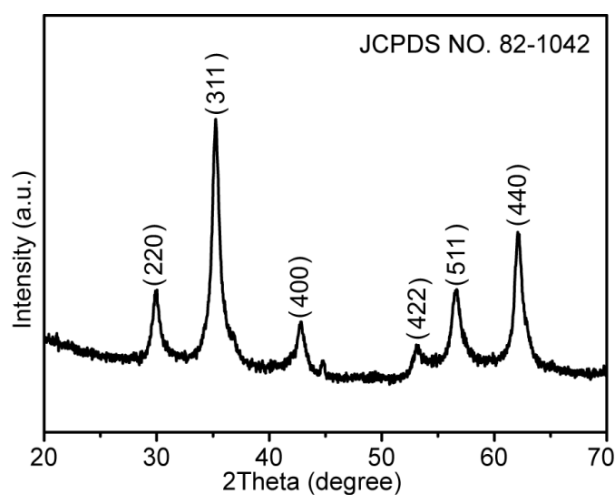

**Figure S1.** XRD pattern of pure ZnFe<sub>2</sub>O<sub>4</sub> NPs.

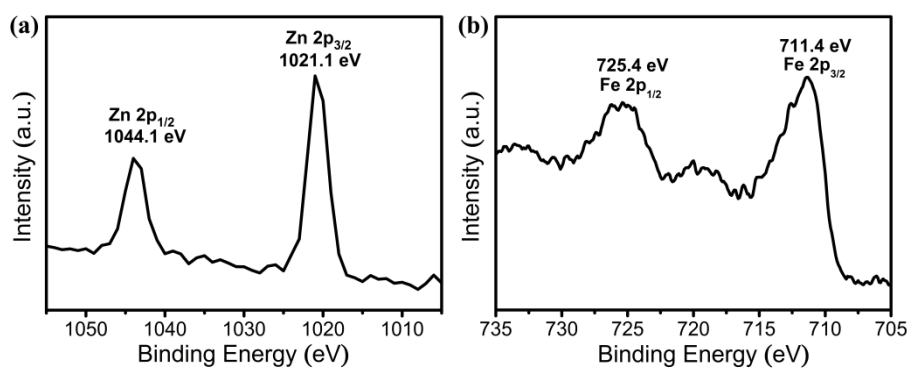

**Figure S2.** High-resolution XPS spectrum of Zn2p (a) and Fe2p (b) from ZnFe<sub>2</sub>O<sub>4</sub>-rGO NCs.

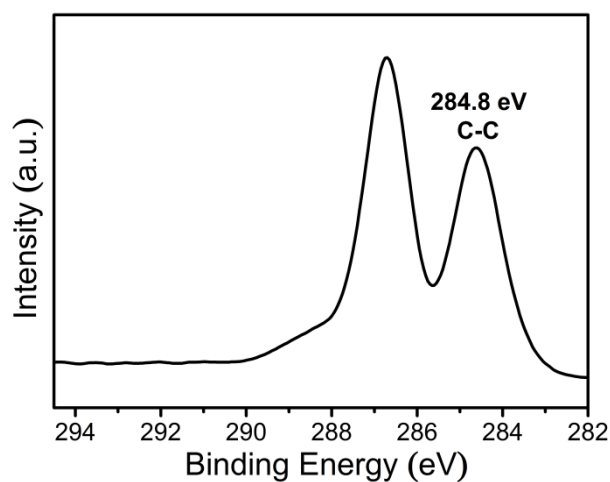

**Figure S3.** High-resolution XPS spectrum of C1s from GO.

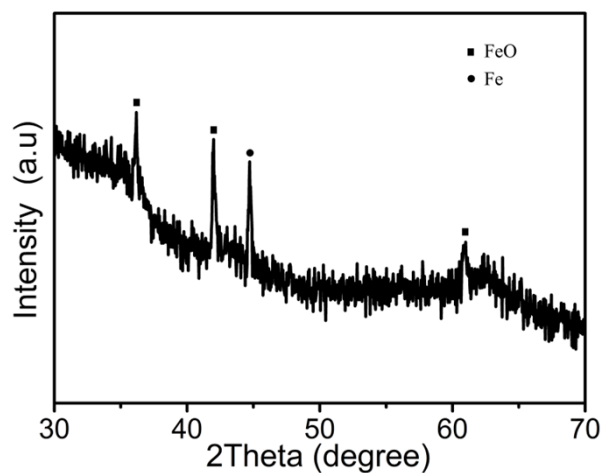

**Figure S4.** The XRD pattern of the fresh  $\text{FeO}_x$  colloids prepared by LAL of a Fe target in pure water.

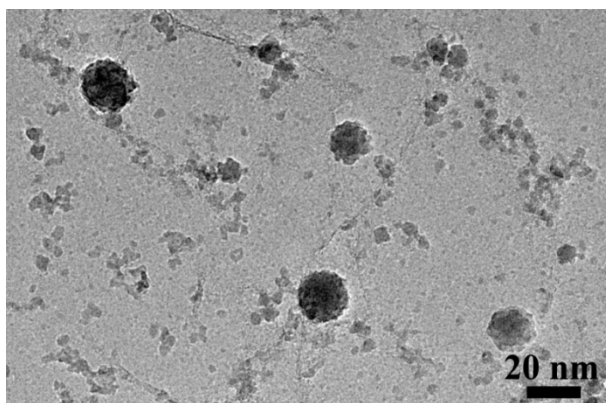

**Figure S5.** The TEM image of the  $\text{FeO}_x$ -GO NCs.

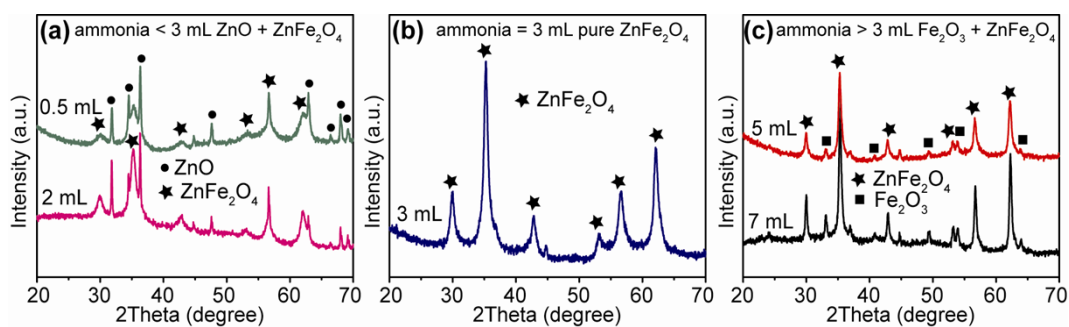

**Figure S6.** XRD pattern of products obtained with different amount of added ammonia. (a) The volume of ammonia is less than 3 mL; (b) the volume of ammonia is 3 mL; (c) the volume of ammonia is more than 3 mL.

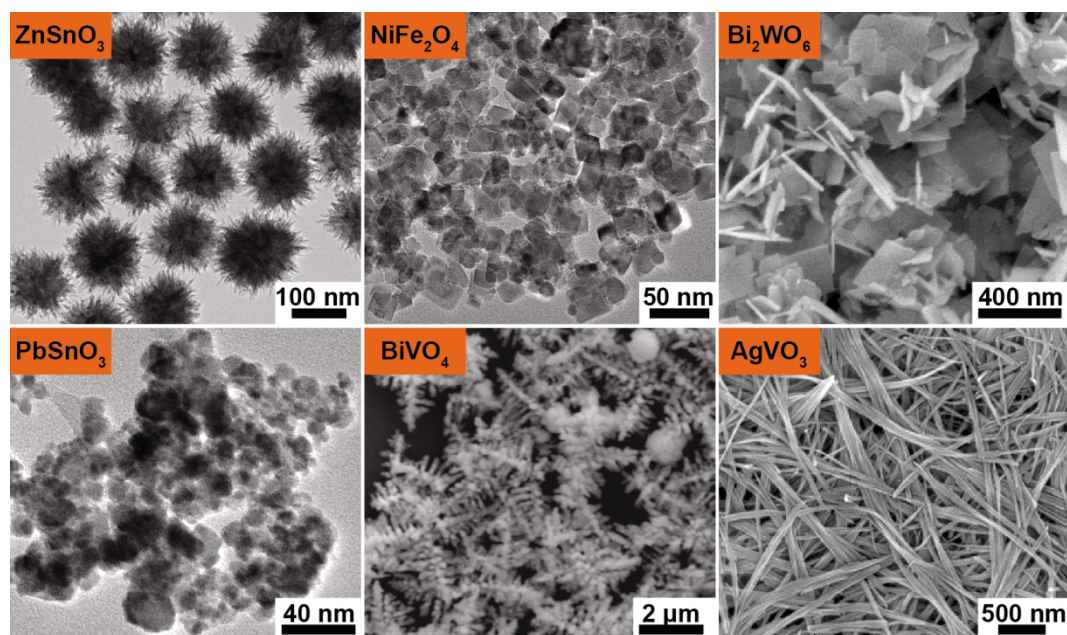

**Figure S7.** Images of different pure ternary compounds prepared by hydrothermal treatment of two highly reactive colloids, which were obtained by laser ablation of pure metal targets in pure water.
